# Supplementary material
Source: publisher figshare collection journal article supplement (https://diabetesjournals.figshare.com/articles/dataset/_/19411307)
Supplement: Supplementary file 1 [file 1]

## Checklist for Reporting Human Islet Preparations Used in Research

Adapted from Hart NJ, Powers AC (2018) Progress, challenges, and suggestions for using human islets to understand islet biology and human diabetes. Diabetologia <https://doi.org/10.1007/s00125-018-4772-2>.

|                                                                                                                                                                                                            |                                                                                |
|------------------------------------------------------------------------------------------------------------------------------------------------------------------------------------------------------------|--------------------------------------------------------------------------------|
| <b>Manuscript DOI:</b> <a href="https://doi.org/10.2337/[DB21-0681]">https://doi.org/10.2337/[DB21-0681]</a> (Example, <a href="https://doi.org/10.2337/db18-1234">https://doi.org/10.2337/db18-1234</a> ) |                                                                                |
| <b>Title:</b> DOC2b Boosts $\beta$ -Cell Function Via A Novel Tyrosine Phosphorylation Dependent Mechanism                                                                                                 |                                                                                |
| <b>Author list:</b> Diti Chatterjee Bhowmick, Arianne Aslamy, Supriyo Bhattacharya, Eunjin Oh, Miwon Ahn, and Debbie C. Thurmond                                                                           |                                                                                |
| <b>Corresponding author:</b> Debbie C. Thurmond                                                                                                                                                            | <b>Email address:</b> <a href="mailto:dthurmond@coh.org">dthurmond@coh.org</a> |

| Islet preparation              | 1                          | 2                 | 3                 | 4                  | 5                  | 6                  | 7        | 8 <sup>a</sup> |
|--------------------------------|----------------------------|-------------------|-------------------|--------------------|--------------------|--------------------|----------|----------------|
| MANDATORY INFORMATION          |                            |                   |                   |                    |                    |                    |          |                |
| Unique identifier              | RRID:SAMN16427178 (HU1205) | RRID:SAMN17367763 | RRID:SAMN18196260 | RRID: SAMN21399152 | RRID: SAMN22814513 | RRID: SAMN22818629 | HU1232   |                |
| Donor age (years)              | 42 Years                   | 56.00 Years       | 41.00 Years       | 29 Years           | 26 Years           | 45 Years           | 45 Years |                |
| Donor sex (M/F)                | Female                     | Male              | Female            | Male               | Male               | Female             | Female   |                |
| Donor BMI (kg/m <sup>2</sup> ) | 31.2                       | 33.00             | 28.00             | 22.9               | 29.2               | 21.7               | 25.2     |                |

|                                                                                  |                                                      |                                       |                                       |                                           |                                                         |                               |                                                            |  |
|----------------------------------------------------------------------------------|------------------------------------------------------|---------------------------------------|---------------------------------------|-------------------------------------------|---------------------------------------------------------|-------------------------------|------------------------------------------------------------|--|
| Donor HbA <sub>1c</sub><br>or other<br>measure of<br>blood<br>glucose<br>control | HbA <sub>1c</sub> : 5.5%                             | HbA <sub>1c</sub> : 5.3%              | HbA <sub>1c</sub> : 5.3%              | HbA <sub>1c</sub> : 5.3%                  | HbA <sub>1c</sub> : 5.4%                                | HbA <sub>1c</sub> : 5.5%      | HbA <sub>1c</sub> :<br>4.9%                                |  |
| Origin/source<br>of islets <sup>b</sup>                                          | Southern California<br>Islet cell resource<br>Center | The Scharp-Lacy<br>Research Institute | The Scharp-Lacy<br>Research Institute | The Scharp-<br>Lacy Research<br>Institute | Southern<br>California Islet<br>cell resource<br>Center | University of<br>Pennsylvania | Southern<br>California<br>Islet cell<br>resource<br>Center |  |
| Islet isolation<br>centre                                                        | Southern California<br>Islet cell resource<br>Center | The Scharp-Lacy<br>Research Institute | The Scharp-Lacy<br>Research Institute | The Scharp-<br>Lacy Research<br>Institute | Southern<br>California Islet<br>cell resource<br>Center | University of<br>Pennsylvania | Southern<br>California<br>Islet cell<br>resource<br>Center |  |
| Donor<br>history of<br>diabetes?<br>Yes/No                                       | No                                                   | No                                    | No                                    | No                                        | No                                                      | No                            | No                                                         |  |
| <b>If Yes, complete the next two lines if this information is available</b>      |                                                      |                                       |                                       |                                           |                                                         |                               |                                                            |  |
| Diabetes<br>duration<br>(years)                                                  |                                                      |                                       |                                       |                                           |                                                         |                               |                                                            |  |
| Glucose-<br>lowering<br>therapy at<br>time of<br>death <sup>c</sup>              |                                                      |                                       |                                       |                                           |                                                         |                               |                                                            |  |

### RECOMMENDED INFORMATION

|                                                                                   |                                                                                                                                   |                                                          |                                                          |                                                          |                                                                                   |                                                          |                                                                                   |  |
|-----------------------------------------------------------------------------------|-----------------------------------------------------------------------------------------------------------------------------------|----------------------------------------------------------|----------------------------------------------------------|----------------------------------------------------------|-----------------------------------------------------------------------------------|----------------------------------------------------------|-----------------------------------------------------------------------------------|--|
| Donor cause of death                                                              | Cerebrovascular/Stroke                                                                                                            | Head trauma                                              | Cerebrovascular/stroke                                   | Anoxia                                                   | Head trauma                                                                       | Anoxia                                                   | Anoxia                                                                            |  |
| Warm ischaemia time (h)                                                           |                                                                                                                                   |                                                          |                                                          |                                                          |                                                                                   |                                                          |                                                                                   |  |
| Cold ischaemia time (h)                                                           | 403 minutes                                                                                                                       | 656 minutes                                              | 417 minutes                                              |                                                          |                                                                                   | 943 minutes                                              | 9.65 hours                                                                        |  |
| Estimated purity (%)                                                              | 80%                                                                                                                               | 90%                                                      | 95%                                                      | 95%                                                      | 75%                                                                               | 90%                                                      | 90%                                                                               |  |
| Estimated viability (%)                                                           | 96%                                                                                                                               | 95%                                                      | 95%                                                      | 95%                                                      | 95%                                                                               | 94%                                                      |                                                                                   |  |
| Total culture time (h) <sup>d</sup>                                               |                                                                                                                                   | 2 days 19.00 hours                                       | 4 days 16.00 hours                                       | 4 days 5 hours                                           |                                                                                   | 2 days 20 hours                                          | 92.5 hours                                                                        |  |
| Glucose-stimulated insulin secretion or other functional measurement <sup>e</sup> | Glucose-stimulated insulin release stimulation (SI): 20                                                                           | Glucose-stimulated insulin release stimulation (SI): 1.5 | Glucose-stimulated insulin release stimulation (SI): 2.3 | Glucose-stimulated insulin release stimulation (SI): 2.5 | Glucose-stimulated insulin release stimulation (SI): 3.2                          | Glucose-stimulated insulin release stimulation (SI): 1.7 |                                                                                   |  |
| Handpicked to purity? Yes/No                                                      | Yes                                                                                                                               | Yes                                                      | Yes                                                      | Yes                                                      | Yes                                                                               | Yes                                                      | Yes                                                                               |  |
| Additional notes                                                                  | We directly picked up the islets, as we are located in the same building with the Southern California Islet cell resource Center. |                                                          |                                                          |                                                          | We directly picked up the islets, as we are located in the same building with the |                                                          | We directly picked up the islets, as we are located in the same building with the |  |

|  |  |  |  |  |                                                             |  |  |  |
|--|--|--|--|--|-------------------------------------------------------------|--|--|--|
|  |  |  |  |  | Southern<br>California<br>Islet cell<br>resource<br>Center. |  |  |  |
|--|--|--|--|--|-------------------------------------------------------------|--|--|--|

<sup>a</sup>If you have used more than eight islet preparations, please complete additional forms as necessary

<sup>b</sup>For example, IIDP, ECIT, Alberta IsletCore

<sup>c</sup>Please specify the therapy/therapies

<sup>d</sup>Time of islet culture at the isolation centre, during shipment and at the receiving laboratory

<sup>e</sup>Please specify the test and the results
